# Supplementary material for: A label-free and enzyme-free system for operating various logic devices using poly(thymine)-templated CuNPs and SYBR Green I as signal transducers
Source: Royal Society of Chemistry journal article supplement (doi:10.1039/c6nr04069a), 2016-01-01
Supplement: c6nr04069a1.pdf [file c6nr04069a1.pdf]

## Supporting Information

### **A Label-free and enzyme-free system for operating various logic circuits using poly(thymine)-templated CuNPs and SYBR Green I as signal transducers**

**Changtong Wu,<sup>a,b</sup> Chunyang Zhou,<sup>a</sup> Erkang Wang<sup>a</sup> and Shaojun Dong<sup>\*a</sup>**

<sup>a</sup> State Key Laboratory of Electroanalytical Chemistry, Changchun Institute of Applied Chemistry, Chinese Academy of Sciences, Changchun, Jilin, 130022, P. R. China. E-mail: dongsj@ciac.ac.cn, ekwang@ciac.ac.cn

<sup>b</sup> Department of Chemistry and Environmental Engineering, Changchun University of Science and Technology, Changchun, China

**Table S1. DNA sequences used in the designed logic operations.**

| Strands        | Sequences ( 5'- 3')                                   |
|----------------|-------------------------------------------------------|
| P-DNA          | CCAGA TATTC ACCGG                                     |
| D <sub>0</sub> | AAAAA AAAAA AAAAA AAAAA AAAAA AAAAA                   |
| D <sub>1</sub> | TTTTT TTTTT TTTTT TTTTT TTTTT TTTTT                   |
| D <sub>2</sub> | CCGGT GAATA TCTGG                                     |
| D <sub>3</sub> | CCGGT GAATA TCTGG TTTTT TTTTT TTTTT TTTTT TTTTT TTTTT |

To find the available DNA sequences for the developed higher-order logic gates, the designed DNA sequences were firstly mimicked on the website <http://mfold.rna.albany.edu/?q=DINAMelt/TwoState-melting> and then modified according to the experimental results. The above procedures were repeated until the available DNA sequences were obtained.

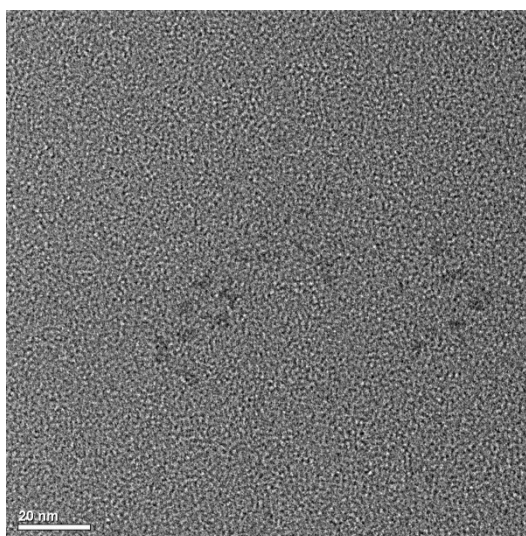

Fig. S1 Representative TEM image of as-synthesized CuNPs using polyT (T30) ss-DNA as template.

The as-synthesized CuNPs was characterized with Transmission electron microscopy (TEM) as shown in Fig. S1. The size of as-synthesized CuNPs was about 4 nm, which is consistent with previous report.<sup>1</sup>

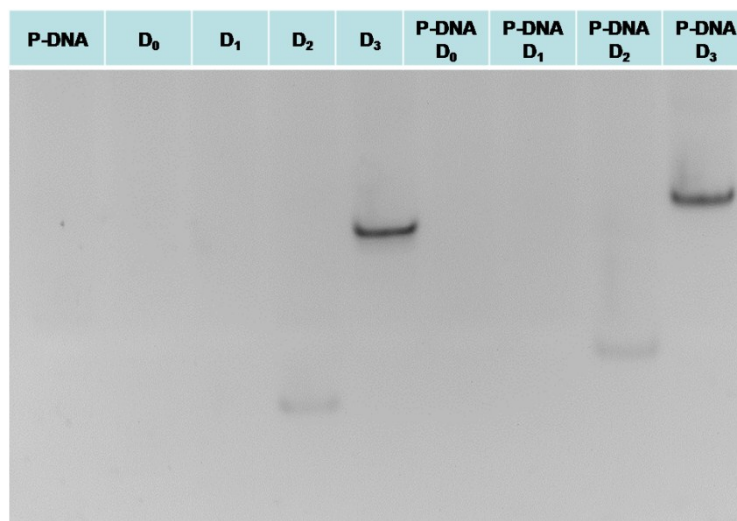

Fig. S2 PAGE analysis of DNA interactions for the 4-to-2 encoder

The first five belts from left indicate the ss-DNAs of P-DNA, D<sub>0</sub>, D<sub>1</sub>, D<sub>2</sub> and D<sub>3</sub> in sequence. No obvious belts can be found from P-DNA. It maybe attributes to the short length of P-DNA. The same phenomenon appears to D<sub>0</sub> and D<sub>1</sub> since these two poly-DNA strands cannot form any secondary structures, resulting in low binding affinity to the ds-DNA dyes used for the PAGE analysis. In the coexistence of P-DNA/D<sub>0</sub> or the coexistence of P-DNA/D<sub>1</sub>, no belt appears at new position, suggesting no hybridization reaction happens. Belts appear at new positions in the presence of P-DNA/D<sub>2</sub> and P-DNA/D<sub>3</sub>, indicating the formation of the corresponding duplex.

## References

1. Z. Qing, X. He, D. He, K. Wang, F. Xu, T. Qing and X. Yang, *Angew. Chem.Int. Ed.*, 2013, **52**, 9719-9722.
